# Supplementary material
Source: publisher site journal article supplement (https://www.spandidos-publications.com/6766/downloadSupplementary)
Supplement: Supplementary file 1 [file downloadSupplementary]

## Sheet: Supplementary_Table_SI
Table SI. RNA sequencing sample overview.
Sample ID	Experimental condition	Metadata	RNA extraction kit	Library preparation	Sequencing platform	File name	File type	Total sequences	Total bases (Gbp)	Sequences flagged as poor quality	Sequence length	% GC	Average sequence length	Median sequence length	Basic statistics	Per base sequence quality	Per sequence quality scores	Per base sequence content	Per sequence GC content	Per base N content	Sequence length distribution	Sequence duplication levels	Overrepresented sequences	Adapter content	N unmapped (%)	N multimapping (%)	N no feature (%)	N ambiguous (%)
C1_00	Control	Replicate 1, timepoint 0 h	QIAGEN RNeasy Mini kit, MGIEasy rRNA Depletion Kit	MGIEasy RNA Directional Library Prep kit	MGI DNBSEQ-G400RS	C1_00_1.fq.gz	Conventional base calls	58639193	5.8	0	100	52	100	100	Pass	Pass	Pass	Warn	Warn	Pass	Pass	Warn	Warn	Pass	0.670637	15.2866	12.2416	4.98249
						C1_00_2.fq.gz	Conventional base calls	58639193	5.8	0	100	52	100	100	Pass	Pass	Pass	Warn	Pass	Pass	Pass	Warn	Warn	Pass
C1_02	Control	Replicate 1, timepoint 2 h	QIAGEN RNeasy Mini kit, MGIEasy rRNA Depletion Kit	MGIEasy RNA Directional Library Prep kit	MGI DNBSEQ-G400RS	C1_02_1.fq.gz	Conventional base calls	63965424	6.3	0	100	52	100	100	Pass	Pass	Pass	Warn	Warn	Pass	Pass	Warn	Warn	Pass	0.848633	16.7591	10.8269	4.74044
						C1_02_2.fq.gz	Conventional base calls	63965424	6.3	0	100	52	100	100	Pass	Pass	Pass	Warn	Warn	Pass	Pass	Warn	Warn	Pass
C1_06	Control	Replicate 1, timepoint 6 h	QIAGEN RNeasy Mini kit, MGIEasy rRNA Depletion Kit	MGIEasy RNA Directional Library Prep kit	MGI DNBSEQ-G400RS	C1_06_1.fq.gz	Conventional base calls	57392985	5.7	0	100	52	100	100	Pass	Pass	Pass	Warn	Warn	Pass	Pass	Warn	Warn	Pass	0.797056	17.2475	11.3617	4.68024
						C1_06_2.fq.gz	Conventional base calls	57392985	5.7	0	100	52	100	100	Pass	Pass	Pass	Warn	Warn	Pass	Pass	Warn	Warn	Pass
C1_24	Control	Replicate 1, timepoint 24 h	QIAGEN RNeasy Mini kit, MGIEasy rRNA Depletion Kit	MGIEasy RNA Directional Library Prep kit	MGI DNBSEQ-G400RS	C1_24_1.fq.gz	Conventional base calls	63690197	6.3	0	100	51	100	100	Pass	Pass	Pass	Warn	Pass	Pass	Pass	Warn	Pass	Pass	0.525784	14.0951	12.3364	4.40604
						C1_24_2.fq.gz	Conventional base calls	63690197	6.3	0	100	51	100	100	Pass	Pass	Pass	Warn	Pass	Pass	Pass	Warn	Warn	Pass
C2_00	Control	Replicate 2, timepoint 0 h	QIAGEN RNeasy Mini kit, MGIEasy rRNA Depletion Kit	MGIEasy RNA Directional Library Prep kit	MGI DNBSEQ-G400RS	C2_00_1.fq.gz	Conventional base calls	59289544	5.9	0	100	52	100	100	Pass	Pass	Pass	Warn	Pass	Pass	Pass	Warn	Warn	Pass	0.671567	16.2474	11.2012	4.65631
						C2_00_2.fq.gz	Conventional base calls	59289544	5.9	0	100	53	100	100	Pass	Pass	Pass	Warn	Warn	Pass	Pass	Warn	Warn	Pass
C2_02	Control	Replicate 2, timepoint 2 h	QIAGEN RNeasy Mini kit, MGIEasy rRNA Depletion Kit	MGIEasy RNA Directional Library Prep kit	MGI DNBSEQ-G400RS	C2_02_1.fq.gz	Conventional base calls	58786114	5.8	0	100	52	100	100	Pass	Pass	Pass	Warn	Pass	Pass	Pass	Warn	Warn	Pass	0.556796	15.7877	10.4352	4.8862
						C2_02_2.fq.gz	Conventional base calls	58786114	5.8	0	100	53	100	100	Pass	Pass	Pass	Warn	Pass	Pass	Pass	Warn	Warn	Pass
C2_06	Control	Replicate 2, timepoint 6 h	QIAGEN RNeasy Mini kit, MGIEasy rRNA Depletion Kit	MGIEasy RNA Directional Library Prep kit	MGI DNBSEQ-G400RS	C2_06_1.fq.gz	Conventional base calls	60440416	6	0	100	52	100	100	Pass	Pass	Pass	Warn	Pass	Pass	Pass	Warn	Warn	Pass	0.637142	15.9703	8.44322	4.69135
						C2_06_2.fq.gz	Conventional base calls	60440416	6	0	100	52	100	100	Pass	Pass	Pass	Warn	Warn	Pass	Pass	Warn	Warn	Pass
C2_24	Control	Replicate 2, timepoint 24 h	QIAGEN RNeasy Mini kit, MGIEasy rRNA Depletion Kit	MGIEasy RNA Directional Library Prep kit	MGI DNBSEQ-G400RS	C2_24_1.fq.gz	Conventional base calls	61262390	6.1	0	100	51	100	100	Pass	Pass	Pass	Warn	Pass	Pass	Pass	Warn	Warn	Pass	0.510991	14.5931	11.7063	4.75285
						C2_24_2.fq.gz	Conventional base calls	61262390	6.1	0	100	52	100	100	Pass	Pass	Pass	Warn	Pass	Pass	Pass	Warn	Warn	Pass
C3_00	Control	Replicate 3, timepoint 0 h	QIAGEN RNeasy Mini kit, MGIEasy rRNA Depletion Kit	MGIEasy RNA Directional Library Prep kit	MGI DNBSEQ-G400RS	C3_00_1.fq.gz	Conventional base calls	59083214	5.9	0	100	51	100	100	Pass	Pass	Pass	Warn	Pass	Pass	Pass	Warn	Warn	Pass	0.582008	14.6497	10.1028	4.86678
						C3_00_2.fq.gz	Conventional base calls	59083214	5.9	0	100	51	100	100	Pass	Pass	Pass	Warn	Pass	Pass	Pass	Warn	Warn	Pass
C3_02	Control	Replicate 3, timepoint 2 h	QIAGEN RNeasy Mini kit, MGIEasy rRNA Depletion Kit	MGIEasy RNA Directional Library Prep kit	MGI DNBSEQ-G400RS	C3_02_1.fq.gz	Conventional base calls	56039564	5.6	0	100	52	100	100	Pass	Pass	Pass	Warn	Pass	Pass	Pass	Warn	Warn	Pass	0.694495	16.7963	10.2272	4.67207
						C3_02_2.fq.gz	Conventional base calls	56039564	5.6	0	100	53	100	100	Pass	Pass	Pass	Warn	Pass	Pass	Pass	Warn	Pass	Pass
C3_06	Control	Replicate 3, timepoint 6 h	QIAGEN RNeasy Mini kit, MGIEasy rRNA Depletion Kit	MGIEasy RNA Directional Library Prep kit	MGI DNBSEQ-G400RS	C3_06_1.fq.gz	Conventional base calls	60455447	6	0	100	52	100	100	Pass	Pass	Pass	Warn	Warn	Pass	Pass	Warn	Warn	Pass	0.755371	16.9976	9.31848	4.7138
						C3_06_2.fq.gz	Conventional base calls	60455447	6	0	100	53	100	100	Pass	Pass	Pass	Warn	Warn	Pass	Pass	Warn	Warn	Pass
C3_24	Control	Replicate 3, timepoint 24 h	QIAGEN RNeasy Mini kit, MGIEasy rRNA Depletion Kit	MGIEasy RNA Directional Library Prep kit	MGI DNBSEQ-G400RS	C3_24_1.fq.gz	Conventional base calls	60437779	6	0	100	52	100	100	Pass	Pass	Pass	Warn	Pass	Pass	Pass	Warn	Warn	Pass	0.664507	16.7725	9.34033	4.4892
						C3_24_2.fq.gz	Conventional base calls	60437779	6	0	100	53	100	100	Pass	Pass	Pass	Warn	Pass	Pass	Pass	Warn	Pass	Pass
S1_00	Treatment	Replicate 1, timepoint 0 h	QIAGEN RNeasy Mini kit, MGIEasy rRNA Depletion Kit	MGIEasy RNA Directional Library Prep kit	MGI DNBSEQ-G400RS	S1_00_1.fq.gz	Conventional base calls	59587188	5.9	0	100	52	100	100	Pass	Pass	Pass	Warn	Pass	Pass	Pass	Warn	Warn	Pass	0.701485	15.569	11.0758	4.79166
						S1_00_2.fq.gz	Conventional base calls	59587188	5.9	0	100	52	100	100	Pass	Pass	Pass	Warn	Warn	Pass	Pass	Warn	Warn	Pass
S1_02	Treatment	Replicate 1, timepoint 2 h	QIAGEN RNeasy Mini kit, MGIEasy rRNA Depletion Kit	MGIEasy RNA Directional Library Prep kit	MGI DNBSEQ-G400RS	S1_02_1.fq.gz	Conventional base calls	58104803	5.8	0	100	52	100	100	Pass	Pass	Pass	Warn	Pass	Pass	Pass	Warn	Warn	Pass	0.733053	16.7935	10.4913	4.62504
						S1_02_2.fq.gz	Conventional base calls	58104803	5.8	0	100	53	100	100	Pass	Pass	Pass	Warn	Warn	Pass	Pass	Warn	Warn	Pass
S1_06	Treatment	Replicate 1, timepoint 6 h	QIAGEN RNeasy Mini kit, MGIEasy rRNA Depletion Kit	MGIEasy RNA Directional Library Prep kit	MGI DNBSEQ-G400RS	S1_06_1.fq.gz	Conventional base calls	58430155	5.8	0	100	51	100	100	Pass	Pass	Pass	Warn	Pass	Pass	Pass	Warn	Warn	Pass	0.472775	13.8572	12.089	4.45747
						S1_06_2.fq.gz	Conventional base calls	58430155	5.8	0	100	51	100	100	Pass	Pass	Pass	Warn	Warn	Pass	Pass	Warn	Warn	Pass
S1_24	Treatment	Replicate 1, timepoint 24 h	QIAGEN RNeasy Mini kit, MGIEasy rRNA Depletion Kit	MGIEasy RNA Directional Library Prep kit	MGI DNBSEQ-G400RS	S1_24_1.fq.gz	Conventional base calls	60846038	6	0	100	52	100	100	Pass	Pass	Pass	Warn	Pass	Pass	Pass	Warn	Warn	Pass	0.680638	15.7519	9.81678	5.34078
						S1_24_2.fq.gz	Conventional base calls	60846038	6	0	100	53	100	100	Pass	Pass	Pass	Warn	Pass	Pass	Pass	Warn	Warn	Pass
S2_00	Treatment	Replicate 2, timepoint 0 h	QIAGEN RNeasy Mini kit, MGIEasy rRNA Depletion Kit	MGIEasy RNA Directional Library Prep kit	MGI DNBSEQ-G400RS	S2_00_1.fq.gz	Conventional base calls	61117285	6.1	0	100	53	100	100	Pass	Pass	Pass	Warn	Warn	Pass	Pass	Warn	Warn	Pass	0.977193	18.029	8.23176	4.66313
						S2_00_2.fq.gz	Conventional base calls	61117285	6.1	0	100	53	100	100	Pass	Pass	Pass	Warn	Warn	Pass	Pass	Warn	Warn	Pass
S2_02	Treatment	Replicate 2, timepoint 2 h	QIAGEN RNeasy Mini kit, MGIEasy rRNA Depletion Kit	MGIEasy RNA Directional Library Prep kit	MGI DNBSEQ-G400RS	S2_02_1.fq.gz	Conventional base calls	55842449	5.5	0	100	53	100	100	Pass	Pass	Pass	Warn	Warn	Pass	Pass	Warn	Warn	Pass	0.978404	17.4271	10.0369	4.64143
						S2_02_2.fq.gz	Conventional base calls	55842449	5.5	0	100	53	100	100	Pass	Pass	Pass	Warn	Warn	Pass	Pass	Warn	Warn	Pass
S2_06	Treatment	Replicate 2, timepoint 6 h	QIAGEN RNeasy Mini kit, MGIEasy rRNA Depletion Kit	MGIEasy RNA Directional Library Prep kit	MGI DNBSEQ-G400RS	S2_06_1.fq.gz	Conventional base calls	61566051	6.1	0	100	52	100	100	Pass	Pass	Pass	Warn	Pass	Pass	Pass	Warn	Warn	Pass	0.806224	16.8548	8.755	4.80258
						S2_06_2.fq.gz	Conventional base calls	61566051	6.1	0	100	52	100	100	Pass	Pass	Pass	Warn	Warn	Pass	Pass	Warn	Warn	Pass
S2_24	Treatment	Replicate 2, timepoint 24 h	QIAGEN RNeasy Mini kit, MGIEasy rRNA Depletion Kit	MGIEasy RNA Directional Library Prep kit	MGI DNBSEQ-G400RS	S2_24_1.fq.gz	Conventional base calls	51055470	5.1	0	100	52	100	100	Pass	Pass	Pass	Warn	Pass	Pass	Pass	Warn	Warn	Pass	0.708163	17.0136	9.90133	5.20694
						S2_24_2.fq.gz	Conventional base calls	51055470	5.1	0	100	52	100	100	Pass	Pass	Pass	Warn	Warn	Pass	Pass	Warn	Pass	Pass
S3_00	Treatment	Replicate 3, timepoint 0 h	QIAGEN RNeasy Mini kit, MGIEasy rRNA Depletion Kit	MGIEasy RNA Directional Library Prep kit	MGI DNBSEQ-G400RS	S3_00_1.fq.gz	Conventional base calls	33385392	3.3	0	100	55	100	100	Pass	Pass	Pass	Warn	Warn	Pass	Pass	Warn	Warn	Pass	1.26728	18.9258	7.81468	4.9427
						S3_00_2.fq.gz	Conventional base calls	33385392	3.3	0	100	56	100	100	Pass	Pass	Pass	Pass	Warn	Pass	Pass	Warn	Warn	Pass
S3_02	Treatment	Replicate 3, timepoint 2 h	QIAGEN RNeasy Mini kit, MGIEasy rRNA Depletion Kit	MGIEasy RNA Directional Library Prep kit	MGI DNBSEQ-G400RS	S3_02_1.fq.gz	Conventional base calls	37236063	3.7	0	100	56	100	100	Pass	Pass	Pass	Warn	Warn	Pass	Pass	Warn	Warn	Pass	1.56328	20.433	7.16782	4.77302
						S3_02_2.fq.gz	Conventional base calls	37236063	3.7	0	100	57	100	100	Pass	Pass	Pass	Pass	Warn	Pass	Pass	Warn	Warn	Pass
S3_06	Treatment	Replicate 3, timepoint 6 h	QIAGEN RNeasy Mini kit, MGIEasy rRNA Depletion Kit	MGIEasy RNA Directional Library Prep kit	MGI DNBSEQ-G400RS	S3_06_1.fq.gz	Conventional base calls	33434375	3.3	0	100	60	100	100	Pass	Pass	Pass	Warn	Warn	Pass	Pass	Warn	Warn	Pass	3.64895	31.709	6.69702	4.58987
						S3_06_2.fq.gz	Conventional base calls	33434375	3.3	0	100	60	100	100	Pass	Pass	Pass	Pass	Warn	Pass	Pass	Warn	Warn	Pass
S3_24	Treatment	Replicate 3, timepoint 24 h	QIAGEN RNeasy Mini kit, MGIEasy rRNA Depletion Kit	MGIEasy RNA Directional Library Prep kit	MGI DNBSEQ-G400RS	S3_24_1.fq.gz	Conventional base calls	35677455	3.5	0	100	56	100	100	Pass	Pass	Pass	Warn	Warn	Pass	Pass	Warn	Warn	Pass	1.60464	20.5252	8.35576	5.57169
						S3_24_2.fq.gz	Conventional base calls	35677455	3.5	0	100	57	100	100	Pass	Pass	Pass	Warn	Warn	Pass	Pass	Warn	Warn	Pass
